# Supplementary material
Source: Springer Nature journal article supplement (https://www.springermedizin.de/resource/supplementary/12936_2012_2680_MOESM6_ESM.pdf/9544748)

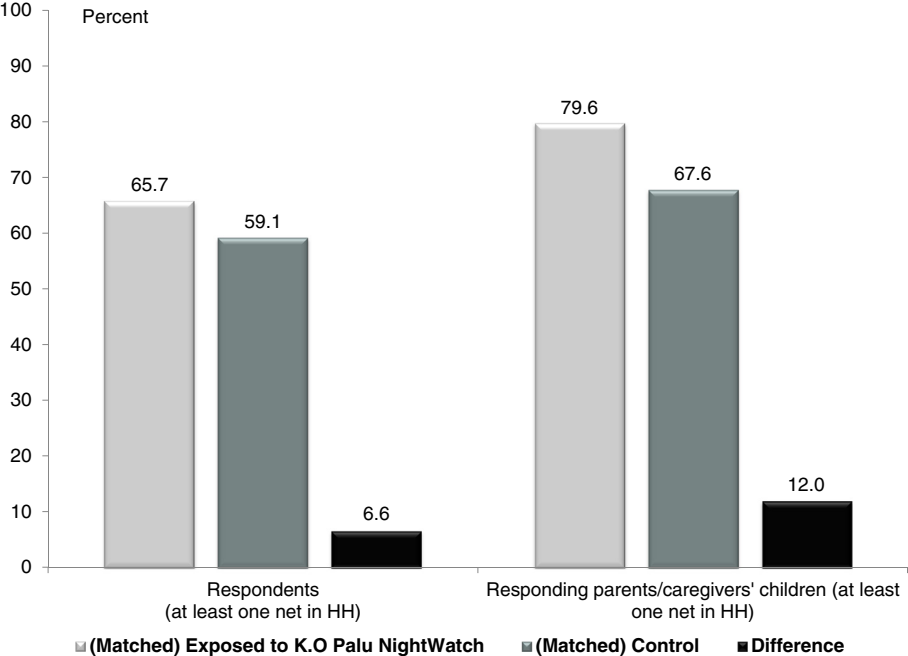

Supplement: MOESM6 [file 9544748]
